# Supplementary material
Source: ML conference proceedings conference paper supplement (https://openaccess.thecvf.com/content/ICCV2023/html/Chen_Dynamic_Residual_Classifier_ICCV_2023_paper.html)
Supplement: Supplementary file 1 [file Chen_Dynamic_Residual_Classifier_ICCV_2023_supplemental.pdf]

# Supplementary Material of Dynamic Residual Classifier for Class Incremental Learning

Xiuwei Chen<sup>1</sup>, Xiaobin Chang<sup>1,2,3\*</sup>

<sup>1</sup>School of Artificial Intelligence, Sun Yat-sen University, China

<sup>2</sup>Guangdong Key Laboratory of Big Data Analysis and Processing, Guangzhou 510006, P.R.China

<sup>3</sup>Key Laboratory of Machine Intelligence and Advanced Computing, Ministry of Education, China

## A. Additional Detailed Analysis Results

The average accuracy of the CIFAR100 / ImageNet100 B0 5, 20 steps settings are presented, in addition to Sec. 4.3.

**Contributions of Different Components** As shown in Tab. I, clear improvements are observed with our DRC.

| Components |     |    | CIFAR100 |          | ImageNet100 |          |
|------------|-----|----|----------|----------|-------------|----------|
| MAF        | DRC | LA | 5 steps  | 20 steps | 5 steps     | 20 steps |
|            |     |    | 65.82    | 64.66    | 70.62       | 66.53    |
| ✓          |     |    | 71.24    | 67.01    | 77.49       | 68.50    |
| ✓          | ✓   |    | 74.43    | 71.50    | 82.16       | 73.67    |
| ✓          | ✓   | ✓  | 74.87    | 71.75    | 82.22       | 75.21    |

Table I. Ablation of MAFDRC components, complement to Tab. 4.

**Branch Layer Merging** Tab. II shows the effectiveness of residual classifier and branch layer merging.

| Methods | CIFAR100 |          | ImageNet100 |          |
|---------|----------|----------|-------------|----------|
|         | 5 steps  | 20 steps | 5 steps     | 20 steps |
| MAF     | 71.24    | 67.01    | 77.49       | 68.50    |
| MAFRC   | 75.12    | 71.23    | 82.51       | 75.11    |
| MAFDRC  | 74.87    | 71.75    | 82.22       | 75.21    |

Table II. The results of MAF with residual classifier and dynamic residual classifier, complement to Tab. 5.

**CIL Pipelines with DRC** As shown in Tab. III, DRC consistently improves all pipelines under the new settings.

| Model | CIFAR100     |              | ImageNet100  |              |
|-------|--------------|--------------|--------------|--------------|
|       | 5 steps      | 20 steps     | 5 steps      | 20 steps     |
| MAF   | 71.24        | 67.01        | 77.49        | 68.50        |
| +DRC  | 74.43(↑3.19) | 71.50(↑4.49) | 82.16(↑4.67) | 73.67(↑5.17) |
| MEC   | 69.02        | 67.52        | 71.49        | 67.61        |
| +DRC  | 70.64(↑1.62) | 69.29(↑1.77) | 73.60(↑2.11) | 68.40(↑0.79) |
| MDT   | 68.24        | 67.01        | 73.07        | 67.12        |
| +DRC  | 70.08(↑1.84) | 68.51(↑1.50) | 73.18(↑0.11) | 68.39(↑1.27) |

Table III. Results of different pipelines with DRC, complement to Tab. 6 in the main text.

**Data Imbalanced Methods** As shown in Tab. IV, DRC is superior to its counterparts, BFT and WA, in handling the data imbalance in CIL.

| Methods | CIFAR100     |              | ImageNet100  |              |
|---------|--------------|--------------|--------------|--------------|
|         | 5 steps      | 20 steps     | 5 steps      | 20 steps     |
| MAF     | 71.24        | 67.01        | 77.49        | 68.50        |
| MAF+BFT | 71.36        | 67.58        | 78.21        | 68.76        |
| MAF+WA  | 71.39        | 67.70        | 79.62        | 68.71        |
| MAF+DRC | <b>74.43</b> | <b>71.50</b> | <b>82.16</b> | <b>73.67</b> |

Table IV. Results of different imbalanced methods, complement to Tab. 7.

**Impact of Memory size** Tab. V shows more results under the memory size of 20 exemplars per class. Results in the memory size of 1,000 exemplars are shown in Tab. VI.

| Methods   | CIFAR100     |              | ImageNet100  |              |
|-----------|--------------|--------------|--------------|--------------|
|           | 5 steps      | 20 steps     | 5 steps      | 20 steps     |
| DER w/o P | <b>74.10</b> | <b>67.06</b> | <b>79.85</b> | <b>72.97</b> |
| FOSTER B4 | <b>74.55</b> | 66.65        | 78.64        | <b>71.31</b> |
| FOSTER    | 72.34        | 66.06        | 76.62        | 70.45        |
| MAFDRC    | 73.19        | <b>66.91</b> | <b>81.31</b> | 70.07        |

Table V. CIL results with reserving 20 exemplars per class, complement to Tab. 8.

| Methods   | CIFAR100     |              |              | ImageNet100  |              |              |
|-----------|--------------|--------------|--------------|--------------|--------------|--------------|
|           | 5 steps      | 10 steps     | 20 steps     | 5 steps      | 10 steps     | 20 steps     |
| DER w/o P | <b>74.37</b> | <b>73.07</b> | <b>72.57</b> | <b>79.67</b> | <b>76.90</b> | <b>75.54</b> |
| FOSTER B4 | 73.04        | 71.16        | 67.86        | 75.58        | 72.99        | 71.41        |
| FOSTER    | 70.34        | 69.63        | 66.92        | 72.88        | 71.55        | 70.48        |
| MAFDRC    | <b>73.46</b> | <b>71.62</b> | <b>67.91</b> | <b>81.20</b> | <b>78.39</b> | <b>72.37</b> |

Table VI. CIL results with a memory size of 1,000 exemplars.

**Impacts of  $\text{tro}$**  To further mitigate classification bias, our method adopts adjusted loss, logit adjustment (LA) [35], as mentioned in Sec. 4.3. Specifically, an adjusting vector  $\gamma_t$

| Methods        | ImageNet100 B0 |              |              |              |              |              | ImageNet100 B50 |              |              |              | ImageNet1000 |              |
|----------------|----------------|--------------|--------------|--------------|--------------|--------------|-----------------|--------------|--------------|--------------|--------------|--------------|
|                | 5 steps        |              | 10 steps     |              | 20 steps     |              | 5 steps         |              | 10 steps     |              | 10 steps     |              |
|                | Avg            | Last         | Avg          | Last         | Avg          | Last         | Avg             | Last         | Avg          | Last         | Avg          | Last         |
| iCaRL [36]     | 71.25          | 60.02        | 65.82        | 50.86        | 61.07        | 44.66        | 58.90           | 49.34        | 48.59        | 41.70        | 53.32        | 33.96        |
| BiC [42]       | 71.24          | 60.98        | 64.93        | 45.98        | 56.18        | 32.32        | 61.65           | 44.98        | 53.71        | 37.38        | -            | -            |
| WA [48]        | 73.89          | 64.06        | 68.00        | 54.48        | 61.96        | 46.02        | 62.78           | 54.24        | 52.84        | 45.70        | -            | -            |
| PODNet [15]    | 72.53          | 58.68        | 62.85        | 44.84        | 54.88        | 36.86        | 75.33           | 66.58        | 72.91        | 62.90        | -            | -            |
| DER w/o p [43] | <b>77.57</b>   | <b>71.28</b> | <b>75.49</b> | <b>66.34</b> | <b>72.87</b> | <b>64.92</b> | <b>77.36</b>    | <b>70.82</b> | <b>75.59</b> | <b>68.94</b> | <b>66.74</b> | <b>57.84</b> |
| FOSTER B4 [41] | 75.81          | 69.66        | 71.37        | 62.58        | 66.42        | <b>54.18</b> | 77.15           | 70.06        | 73.75        | 63.98        | 64.15        | 45.03        |
| FOSTER [41]    | 74.90          | 68.54        | 71.07        | 63.14        | 66.48        | 55.34        | 76.89           | 70.92        | 73.86        | 64.50        | 63.14        | 44.90        |
| MAFDRC         | <b>78.48</b>   | <b>71.28</b> | <b>74.31</b> | <b>63.48</b> | <b>66.84</b> | 52.16        | <b>78.00</b>    | <b>70.94</b> | <b>75.51</b> | <b>68.04</b> | <b>67.40</b> | <b>57.26</b> |

Table VII. ImageNet Results without AutoAugment [6].

| Methods        | CIFAR100 B0  |              |              |              |              |              | CIFAR100 B50 |              |              |              |
|----------------|--------------|--------------|--------------|--------------|--------------|--------------|--------------|--------------|--------------|--------------|
|                | 5 steps      |              | 10 steps     |              | 20 steps     |              | 5 steps      |              | 10 steps     |              |
|                | Avg          | Last         |
| iCaRL [36]     | 66.28        | 53.45        | 64.69        | 48.69        | 64.06        | 47.22        | 52.04        | 43.96        | 43.25        | 37.70        |
| BiC [42]       | 65.03        | 54.19        | 62.21        | 47.69        | 61.16        | 40.91        | 58.36        | 44.40        | 55.71        | 42.93        |
| WA [48]        | 66.07        | 55.51        | 65.66        | 51.25        | 65.05        | 48.63        | 60.86        | 51.99        | 55.84        | 48.12        |
| PODNet [15]    | 63.69        | 50.18        | 55.98        | 38.04        | 48.68        | 29.10        | 64.69        | 55.38        | <b>63.11</b> | 52.76        |
| DER w/o P [43] | <b>71.35</b> | <b>63.55</b> | <b>71.02</b> | <b>60.18</b> | <b>69.75</b> | <b>57.22</b> | <b>68.09</b> | <b>61.90</b> | <b>66.36</b> | <b>59.70</b> |
| FOSTER B4 [41] | 67.95        | 56.17        | 64.20        | 49.86        | 60.80        | 45.67        | <b>65.47</b> | <b>57.27</b> | 61.81        | <b>53.17</b> |
| FOSTER [41]    | 65.77        | 54.94        | 62.70        | 49.14        | 59.94        | 45.04        | 64.48        | 55.65        | 61.26        | 51.71        |
| MAFDRC         | <b>70.12</b> | <b>59.05</b> | <b>67.72</b> | <b>54.24</b> | <b>65.84</b> | <b>50.76</b> | 64.53        | 56.33        | 60.95        | 52.49        |

Table VIII. CIFAR100 Results without AutoAugment [6].

is used to adjust the original classifier logit  $\bar{\ell}_t$ ,

$$\eta_t = \bar{\ell}_t + \gamma_t, \quad (\text{i})$$

and the adjusted one,  $\eta_t$ , can be used to compute losses.  $\gamma_t$  is computed as,

$$\gamma_t^i = \log \left[ \left( \frac{m_i}{m_1 + m_2 + \dots + m_t} \right)^{tro} \right], \quad (\text{ii})$$

where  $m_i$  is the sample number of the  $i^{th}$ ,  $i = \{1, \dots, t\}$  task in new data  $D_t$  or memory buffer  $M_t$ .  $tro$  is a hyperparameter of LA and is fixed at 1.2. As shown in Tab. IX, our method is not sensitive to different  $tro$ s.

| tro | 1.0   | 1.2   | 1.4   | 1.6   | 1.8   | 2.0   |
|-----|-------|-------|-------|-------|-------|-------|
| Avg | 71.04 | 71.75 | 71.99 | 71.75 | 71.76 | 71.00 |

Table IX. Impacts of different  $tro$ s on model performance. CIFAR100 B0 20 steps results are reported.

## B. Additional Main Results

In the main text, different CIL methods are trained with AutoAugment [6]. Their results are reported in Tab. I and

Tab. 2. In this section, we reproduce the corresponding results without such data augmentation, as shown in Tab. VII and Tab. VIII, respectively. The proposed MAFDRC still achieves the same level of performance as the state-of-the-art methods, e.g., FOSTER [41] and DER [43]. In particular, under the CIL setting of ImageNet1000 10 steps, our method achieves similar results compared to DER w/o P but with a much smaller model size.

**Vision Transformer (ViT) Backbone** The DyTox ViT encoder replaces ResNet as the feature extractor, resulting in MAF(ViT) and MAFDRC(ViT). As shown in Tab. X, DRC clearly boosts baseline results and performs similarly to DyTox.

| Methods            | CIFAR100 B0 |       |          |       |          |       |
|--------------------|-------------|-------|----------|-------|----------|-------|
|                    | 5 steps     |       | 10 steps |       | 20 steps |       |
|                    | Avg         | Last  | Avg      | Last  | Avg      | Last  |
| MAF(ViT)           | 63.83       | 44.84 | 58.58    | 36.69 | 57.11    | 32.39 |
| DyTox <sup>†</sup> | 71.78       | 61.31 | 69.63    | 55.65 | 67.00    | 50.85 |
| MAFDRC(ViT)        | 72.48       | 62.78 | 69.49    | 56.13 | 66.73    | 48.65 |

Table X. CIL results with ViT-based feature extractor. <sup>†</sup> indicates the DyTox results are reproduced under the same setting (e.g., data augmentation and trained on a single GPU) with others.

**Averaged Results of Three Runs** As shown in Tab. XI and Tab. XII, the proposed method achieves the SOTA-level

performance and is statistically better than its counterparts.

| Methods   | 5 steps          |                  | 10 steps         |                  | 20 steps         |                  |
|-----------|------------------|------------------|------------------|------------------|------------------|------------------|
|           | Avg              | Last             | Avg              | Last             | Avg              | Last             |
| DER w/o P | 81.64 $\pm$ 0.62 | 75.23 $\pm$ 0.69 | 79.54 $\pm$ 1.10 | 70.55 $\pm$ 0.52 | 78.12 $\pm$ 0.11 | 70.91 $\pm$ 0.60 |
| FOSTER B4 | 80.31 $\pm$ 0.67 | 73.28 $\pm$ 0.61 | 77.10 $\pm$ 0.51 | 67.93 $\pm$ 0.87 | 74.39 $\pm$ 0.21 | 62.65 $\pm$ 0.66 |
| FOSTER    | 79.35 $\pm$ 0.94 | 71.87 $\pm$ 0.48 | 76.51 $\pm$ 0.28 | 67.09 $\pm$ 0.53 | 74.20 $\pm$ 0.30 | 62.78 $\pm$ 0.37 |
| MAFDRC    | 82.31 $\pm$ 0.33 | 76.05 $\pm$ 0.30 | 79.78 $\pm$ 0.28 | 70.56 $\pm$ 0.39 | 75.63 $\pm$ 0.25 | 64.14 $\pm$ 0.71 |

Table XI. Three runs results (averaged accuracy  $\pm$  standard error) on ImageNet100 B0. Red indicates the best performance and blue indicates the second best results.

| Methods   | 5 steps          |                  | 10 steps         |                  | 20 steps         |                  |
|-----------|------------------|------------------|------------------|------------------|------------------|------------------|
|           | Avg              | Last             | Avg              | Last             | Avg              | Last             |
| DER w/o P | 75.19 $\pm$ 0.61 | 68.78 $\pm$ 0.34 | 74.84 $\pm$ 0.81 | 65.74 $\pm$ 0.55 | 73.85 $\pm$ 0.64 | 62.92 $\pm$ 0.73 |
| FOSTER B4 | 73.96 $\pm$ 0.77 | 64.78 $\pm$ 0.71 | 72.91 $\pm$ 0.74 | 61.54 $\pm$ 0.90 | 70.40 $\pm$ 0.57 | 56.87 $\pm$ 0.66 |
| FOSTER    | 71.85 $\pm$ 1.01 | 62.58 $\pm$ 0.99 | 71.58 $\pm$ 0.62 | 60.39 $\pm$ 0.28 | 69.41 $\pm$ 0.55 | 56.09 $\pm$ 0.93 |
| MAFDRC    | 74.81 $\pm$ 0.05 | 66.16 $\pm$ 0.26 | 73.85 $\pm$ 0.16 | 61.98 $\pm$ 0.25 | 71.93 $\pm$ 0.34 | 57.43 $\pm$ 0.34 |

Table XII. Three runs results (averaged accuracy  $\pm$  standard error) on CIFAR100 B0. Red indicates the best performance and blue indicates the second best results.
